1 **Combining Focused Identification of Germplasm and Core Collection Strategies to Identify**  
2 **Genebank Accessions for Central European Soybean Breeding**

3 Max Haupt and Karl Schmid<sup>1</sup>

4 Institute of Plant Breeding, Seed Science and Population Genetics, University of Hohenheim,  
5 Stuttgart, Germany

6 **Funding source:** BMEL Grant number FKZ 2814EPS012

7 **ABSTRACT**

8 Environmental adaptation of crops is essential for reliable agricultural production and an important breeding  
9 objectives. Genebanks provide genetic variation for the improvement of modern varieties, but the selection  
10 of suitable germplasm is frequently impeded by incomplete phenotypic data. We address this bottleneck by  
11 combining a *Focused Identification of Germplasm Strategy* (FIGS) with core collection methodology to select  
12 soybean (*Glycine max*) germplasm for Central European breeding from a collection of >17,000 accessions. By  
13 focussing on environmental adaptation to high-latitude cold regions, we selected an 'environmental precore'  
14 of 3,663 accessions using environmental data and compared the Donor Population of Environments (DPE)  
15 in Asia and the Target Population of Environments (TPE) in Central Europe in the present and in 2070.  
16 Using SNP genotypes we reduced the precore into two diverse core collections of 183 and 366 of accessions  
17 as diversity panels for evaluation in high-latitude cold regions. Tests of genetic differentiation between  
18 precore and core collections revealed differentiation signatures in genomic regions that control maturity,  
19 and novel candidate loci for environmental adaptation demonstrating the potential of diversity panels for  
20 studying environmental adaptation. Objective-driven core collections increase germplasm utilization for  
21 abiotic adaptation by breeding for a rapidly changing climate, or *de novo* adaptation of crop species to  
22 expand cultivation ranges.

23 **Keywords:** Soybean, adaptation, core collection, plant breeding, genetic diversity, genebank

---

<sup>1</sup>Correspondence: [karl.schmid@uni-hohenheim.de](mailto:karl.schmid@uni-hohenheim.de)

## 24 INTRODUCTION

25 Many crop species are cultivated outside their center of domestication (Diamond 2002). An expansion  
26 of the cultivation range requires adaptation to local biotic and abiotic environmental conditions,  
27 which can be limited by reduced genetic variation as a result of variation 'left behind' in the center  
28 of origin due to founder effects (Tanksley and McCouch 1997; Hyten et al. 2006). Nevertheless, nu-  
29 merous crops were successfully adapted to novel environments by natural and human selection that  
30 contributed to the rapid expansion of farming beyond centers of domestication (Harlan 1992). In  
31 current plant breeding programs, reduced levels of genetic variation in elite breeding populations  
32 limit breeding progress and the adaptation to rapidly changing environmental conditions. Plant  
33 genetic resources stored in large *ex situ* germplasm collections are an important source of novel,  
34 potentially useful genetic variation to achieve these goals (Wang et al. 2017a).

35 The efficient utilization of plant genetic resources by breeders and researchers is frequently lim-  
36 ited by incomplete phenotypic data for traits of interest, which makes the targeted selection of  
37 putative useful accessions from large germplasm collections very challenging. The *Focused Iden-*  
38 *tification of Germplasm Strategy* (FIGS) promises a solution to this phenotyping bottleneck for  
39 traits associated with environmental adaptation. FIGS is based on the premise that native landraces  
40 evolved during centuries of cultivation in response to local eco-geographic conditions which led  
41 to local adaptation to biotic and abiotic conditions. Genomic footprints of this adaptation should  
42 be detectable if environmental parameters describing plant germplasm collection sites are used as  
43 selection criteria to 'focus in' on a subset of accessions that potentially harbor phenotypic variation  
44 in a target trait. The comprehensive phenotypic and genomic evaluation of focused subsets is more  
45 resource efficient than of large collections (Street et al. 2008; Sanders et al. 2013). FIGS has been  
46 successfully used in a number of crops including *Hordeum vulgare* for agro-morphological char-  
47 acteristics and time of heading and maturity (Endresen 2010), *Triticum aestivum* for resistances to  
48 powdery mildew (Bhullar et al. 2009) and stem rust (Bari et al. 2012), and *Vicia faba* for drought  
49 tolerance (Khazaei et al. 2013). A second tool in the characterization of germplasm collections are  
50 core collections. They are small subsets of larger collections that maximize genetic and phenotypic

51 diversity (Frankel 1984). Similar to trait-focused subsets, core collections provide a resource effi-  
52 cient means for further evaluation and utilization and have been established for many crops based  
53 on passport information, agronomic and morphological data as well as genetic diversity to serve  
54 varying objectives (Odong et al. 2013).

55 The soybean (*Glycine max*) is a typical example of a crop whose cultivation expanded outside its  
56 center of origin. It was originally domesticated in China and is still the most important legume crop  
57 throughout East Asia until today. It was first introduced to Europe and the US in the 18th century.  
58 During the 20th century it became a major crop in the Americas, and is currently the most widely  
59 cultivated legume crop of the world. In Central Europe (CEU), the area of soybean cultivation has  
60 been constantly increasing over the last decade and has revived the interest in breeding improved  
61 varieties for this production environment. This development is driven by the motivation to reduce  
62 dependencies from soy imports, to re-establish legumes in crop rotations for a more sustainable  
63 agriculture, and to mitigate the consequences of climate change by cultivating thermotolerant  
64 crops (BMEL 2016; European Soya Declaration 2017).

65 The adaptation of soybean to Central European production environments is an ongoing effort.  
66 So far, breeding research mainly focused on characterizing adaptive phenotypic variation of elite  
67 breeding germplasm by investigating the genetic basis of time to flowering and maturity (Kurasch  
68 et al. 2017). A portfolio of CEU cultivars that are classified into maturity groups (MGs) exists.  
69 In analogy to the system used in Northern America, MGs express the suitability of a variety for  
70 cultivation within a certain latitudinal range to ensure a full utilization of the vegetation period and  
71 timely maturation. Most cultivars suitable for production in Central Europe belong to the earliest  
72 MGs 000-0 and are mainly derived from North American material (Hahn and Würschum 2014).  
73 This narrow genetic basis (Gizlice et al. 1994) can limit long-term breeding progress and the  
74 utilization of genetic resources may alleviate this situation.

75 In addition to photoperiod, temperature and daily irradiation influence soybean development. Cold  
76 tolerance ensures that the vegetation period in high-latitude cold regions is fully exploited (Kurasch

77 et al. 2017; Balko et al. 2014), but the trait has received little attention in soybean research so far.  
78 Flowering is the most susceptible developmental stage for low temperature, which causes flower  
79 and pod abscissions (Gass et al. 1996). Poor growth in early development and insufficient grain  
80 filling during pod development also reduce grain yield (Littlejohns and Tanner 1976). Phenotyping  
81 for cold tolerance, especially at flowering stage is laborious and a reliable exposure to cold stress  
82 requires controlled conditions, which limited the diversity of germplasm that has been evaluated for  
83 this trait (Funatsuki et al. 2004; Cober et al. 2013; Balko et al. 2014). Previous studies indicated a  
84 polygenic basis of cold tolerance and a potential overlap with the *E* series loci (Funatsuki et al. 2005)  
85 that are responsible for adaptation to photoperiod and soybean diffusion across latitudes (Jiang et al.  
86 2014). Central European varieties exhibit variation in cold tolerance (Balko et al. 2014) and are  
87 used for improving cold tolerance in breeding of varieties for Northern Japan (Yamaguchi et al.  
88 2015). Additional useful variation for cold tolerance and adaptation to high-latitude regions may  
89 be present in Asian landraces that are conserved in *ex situ* germplasm collections.

90 In this study, we present the development of two core collections of the USDA Soybean Germplasm  
91 Collection (Nelson 2011) with a focus on environmental adaptation to high-latitude cold regions to  
92 support the breeding of varieties for cultivation in Central Europe. Following the FIGS approach,  
93 we used environmental data characterizing the geographic origin of landraces and other germplasm  
94 in combination with current and future environmental conditions of the Central European *Target*  
95 *Population of Environments*. First, a precore collection consisting of accessions potentially adapted  
96 to CEU was formed based on environmental data. A scan for genetic differentiation between precore  
97 accessions and non-selected germplasm identified selection signals in genomic regions known to  
98 be involved in environmental adaptation and thus confirmed that FIGS enriched the precore for  
99 adaptive genetic variation. From the environmentally defined precore, we constructed genetically  
100 diverse, but substantially smaller core collections based on marker information. These may be  
101 used by researchers and breeders for comprehensive phenotypic characterization to facilitate trait  
102 discovery for Central European production environments. We show that a combination of FIGS  
103 and core collection methodology to define core subsets driven by targeted objectives will likely

104 contribute to a more rapid and efficient utilization of soybean genetic resources.

## 105 **MATERIALS & METHODS**

### 106 *Plant Material and the Donor Population of Environments*

107 The *G. max* accessions originated from the USDA Soybean Germplasm Collection and only the  
108 *Introduced G. max* sub-collection ( $N > 17,000$ ) was considered, because it includes landraces  
109 (Nelson 2011; Song et al. 2015). Out of 6,180 accessions with georeferences we retained 5,886  
110 Asian accessions by excluding material collected west of 60°E to remove accessions outside the  
111 original soybean cultivation range. The collection sites of the remaining accessions constitute the  
112 *Donor Population of Environments* (DPE) of Asian landraces, which may include potentially useful  
113 germplasm for CEU soybean breeding.

### 115 *Target Population of Environments*

116 The *Target Population of Environments* (TPE) is the set of environments to which germplasm needs  
117 to be adapted for a successful cultivation. Our TPE consists of the soybean production environments  
118 in Central Europe (CEU) and includes Germany, Austria, Switzerland, Poland, Czech Republic and  
119 Slovakia. To characterize the TPE, we georeferenced locations that previously hosted soybean vari-  
120 ety trials (Recknagel 2015; Kurasch et al. 2017). These served as proxies for the geographic extent  
121 of soybean cultivation in CEU since no detailed records regarding soybean cultivation exist for this  
122 region.

### 124 *Environmental Data*

125 Based on the georeferences of the curated collection, environmental data was retrieved from the  
126 WorldClim (version 2) database (Fick and Hijmans 2017) at a resolution of 30 arc-seconds ( $\approx$   
127 1 km<sup>2</sup>). We used variables that are informative for the soybean cropping season in the northern  
128 hemisphere which lasts from May to September. Additionally, we modified the bioclimatic variables

129 to render them informative for the soybean cropping season: Instead of the *annual mean temperature*  
130 (BI01) we computed the *seasonal mean temperature* as the average mean temperature from May  
131 to September. Likewise we proceeded with BI02 to BI04, BI06, BI07 and BI012 to BI015. BI08  
132 to BI011 (*mean temperature of wettest / driest / warmest / coldest quarter*) were replaced by *mean*  
133 *temperatures of wettest / driest / warmest / coldest month* between May and September. BI016  
134 to BI019 (*precipitation of wettest / driest / warmest / coldest quarter*) were replaced by monthly  
135 substitutes. An overview of the data used is provided in Table S1.

136 We also calculated monthly sums of *Crop Heat Units* (CHU) to quantify the accumulation of  
137 temperature over the growing season. CHUs are commonly used in Canada to rate the regional  
138 suitability of warm-season crop varieties with differing thermal requirements (Bootsma et al. 2007)  
139 and were also adopted by Central European soybean growers. Average daily CHU were computed  
140 from monthly averages of daily maximum and minimum temperatures according to Brown and  
141 Bootsma (1993):

$$142 \quad Y_{max} = 3.33 \times (T_{max} - 10) - 0.084 \times (T_{max} - 10.0)^2 \quad (1)$$

$$143 \quad Y_{min} = 1.8 \times (T_{min} - 4.4) \quad (2)$$

$$144 \quad CHU_{daily} = \frac{Y_{max} + Y_{min}}{2} \quad (3)$$

147 where  $T_{max}$  and  $T_{min}$  refer to the monthly averages of daily maximum and minimum temperatures,  
148 respectively. Negative  $Y_{max}$  and  $Y_{min}$  values were set to zero. A similar dataset was assembled for  
149 the TPE considering climate data for both current and future conditions. Climate projections for  
150 the year 2070 were retrieved from WorldClim version 1.4 (Hijmans et al. 2005) for the greenhouse  
151 gas scenario RCP8.5 as modeled by the *Community Climate System Model* (CCSM4.0). Available  
152 projections included average monthly climate data for minimum and maximum temperature, pre-  
153 cipitation and the bioclimatic variables, and were used to compute derived variables as outlined  
154 above. Environmental qualities without projections for the year 2070 were substituted by their

155 current equivalents to preserve the dimensional consistency of the datasets. Latitude information  
156 for the collection sites was included as additional environmental variable to account for the rather  
157 narrow adaptation of soybean germplasm to photoperiod.

### 158 159 ***Environmental Characterization and Selection of Precore Accessions***

160 Principal component analysis (PCA) was performed to summarize the high dimensional datasets  
161 of the DPE and the TPE separately using the `dudi.pca()` function from R `ade4` (Dray and Du-  
162 four 2007). Variables were mean centered and normalized. Correlations (i.e. the loadings) and  
163 squared loadings between the original variables and the principal components were used to quan-  
164 tify the amount of shared information and the contribution of single variables to the components.  
165 Environmental data for the TPE (current and projected for 2070 climate) was used to project  
166 Central European soybean growing environments as illustrative observations into the DPE's multi-  
167 environmental space. The position of a collection site in the multivariate space was then used as  
168 'environmental profile' associated with accessions of corresponding descent. Accessions with an  
169 environmental origin similar to environments of the TPE along the first two principal components  
170 were subsequently included in the precore to form a group of promising accessions with potential  
171 abiotic adaptation to the TPE.

### 172 173 ***Genotypic Data***

174 The USDA Soybean Germplasm Collection has been previously genotyped with the SoySNP50K  
175 array (Song et al. 2013; Song et al. 2015) and genotypes were downloaded from *SoyBase* (<https://soybase.org/snps/>;  
176 May 16, 2017) in the version mapped to the second *G. max* genome  
177 assembly "Glyma.Wm82.a2" (Schmutz et al. 2010). Non-chromosomal SNPs were removed from  
178 the genotype dataset and missing data was imputed using BEAGLE version 4.1 with default settings  
179 (Browning and Browning 2016).

180

## 181 *Phenotypic Data*

182 Phenotypic data for the *Introduced G. max* sub-collection of the USDA Soybean Germplasm col-  
183 lection (Oliveira et al. 2010; Nelson 2011) was retrieved from [https://npgsweb.ars-grin.](https://npgsweb.ars-grin.gov/gringlobal/search.aspx)  
184 [gov/gringlobal/search.aspx](https://npgsweb.ars-grin.gov/gringlobal/search.aspx). Data included qualitative and quantitative trait data like matu-  
185 rity group, 100 seed weight, seed yield, protein and oil contents. We used the quantitative trait data  
186 to assess changes in phenotypic performance and variance in the selection of the core collection.  
187 Homogeneity of variances in groups was tested using the modified robust Brown-Forsythe Levene-  
188 type test based on the absolute deviations from the median as implemented in R `lawstat` version  
189 3.2 (Hui et al. 2008). Significance of differences of the means between groups was assessed with  
190 Welch's unequal variances t-test implemented in R version 3.4.3 with Bonferroni correction for  
191 multiple testing.

## 193 *Core Sampling*

194 Core sampling is based on reducing the number of available accessions by means of redundancy  
195 reduction through penalizing core subset solutions with too many too similar accessions. The large-  
196 scale genotyping of germplasm collections revealed the magnitude of identical and highly similar  
197 accessions in the USDA Soybean Germplasm Collection (Song et al. 2015) and other crops.

198 Core collections were assembled by analysing genotype data with R `Core Hunter` version 3.2  
199 (<http://www.corehunter.org/>). All accessions that qualified after the environmental charac-  
200 terization and/or had a maturity group rating from 000 to I were considered for core sampling. We  
201 used `Core Hunter` in default execution mode, i.e. using the advanced parallel tempering search  
202 algorithm, and fixed the maximum number of steps without improvement to 100 (Beukelaer et al.  
203 2017a; Beukelaer et al. 2017b) to efficiently select core subsets from the population of all possible  
204 cores (Thachuk et al. 2009). We explored different optimization strategies to identify the approach  
205 most suitable to our data and objectives: Sampling objectives regarding (1) optimization (i.e.  
206 maximization) of allelic diversity included the parameters expected heterozygosity and Shannon's



207 diversity index; (2) maximization of genetic distance based on the average entry-to-nearest-entry  
208 distance (Beukelaer et al. 2012) using the Modified Roger's distance (MR) between accessions;  
209 (3) optimization of the auxiliary parameter allele coverage was performed the proportion of alleles  
210 retainable in core collections. For the definition of these measures the reader is referred to Thachuk  
211 et al. (2009). Core sizes of 5%, 10%, 15% and 20% of the input number of accessions were  
212 cross-evaluated for all three optimization objectives. Additionally, the simultaneous optimization  
213 of expected heterozygosity and MR was examined with varying weights to estimate the trade-off  
214 between both approaches. The measures expected heterozygosity, MR and allele coverage were  
215 also assessed for all sets used in this study to evaluate the success of the sampling process.

216 We also explored the effect of different sampling strategies on the subsequent utilization of the core  
217 collection: (1) Cores were sampled without any stratification; (2) they were sampled by means of  
218 classic stratification according to maturity, i.e. cores were sampled separately within three groups  
219 of accessions corresponding to maturity group ratings 000 to 0, I and II to X. A final core was then  
220 obtained by merging the result from these three groups; (3) a more refined 2-fold pseudostratification  
221 sampling strategy was devised and consisted in first sampling within accessions of maturity groups  
222 000 to 0 and adopting the result of this first run as fixed in a second and final sampling run from all  
223 accessions, and (4) a 3-fold pseudostratification strategy first sampled within maturity groups 000  
224 to 0, too. The second run then was limited to maturity groups 000 to I while fixing the result of  
225 the first run. In a third and final run, sampling was performed from all accessions while fixing the  
226 result from the second run. The general rationale behind all stratification strategies was primarily to  
227 retain accessions in the cores relative to their input group sizes by mitigating the effect of varying  
228 levels of genetic similarities within groups on the core sampling process. Table S4 provides a more  
229 detailed overview of the four core sampling strategies. For all reported cores the random seed was  
230 fixed to one prior to sampling for the sake of reproducibility of the core subset selection. To validate  
231 the stability of the results, re-sampling was performed for five additional independent runs with  
232 random seeds to rule out convergence effects.

## 233 **Screening for Signals of Adaptation**

234 To identify genomic regions that reflect adaptive genetic differentiation between precore and non-  
235 selected accessions we used the basic model of BAYPASS (Gautier 2015) for allele count data. Only  
236 marker data for loci with minor allele frequencies  $\geq 0.01$  in the *Introduced G. max* subcollection  
237 was considered. BAYPASS calculates the  $XtX$  statistic that may be seen as a SNP-specific  $F_{ST}$  and  
238 accounts for the variance–covariance structure of the groups for population structure correction  
239 (Günther and Coop 2013). Significance of the observed  $XtX$  signals was assessed from allele  
240 count data for 1,000 SNPs sampled randomly from a pseudo-observed dataset (POD). The POD  
241 was constructed with the R function `simulate.baypass()` based on the covariance matrix of  
242 population allele frequencies ( $\Omega$ ) and other properties of the original data (Gautier 2015). BAYPASS  
243 was then run on the simulated data to produce an empirical distribution of  $XtX$  estimates and the  
244 99% quantile value was used as threshold to distinguish selection from neutrality.

## 245 **RESULTS**

### 246 **Curation of Collection Sites**

247 Of 6,180 USDA soybean accessions with georeferenced collection sites and WorldClim data, 5,886  
248 fell within our definition of the DPE. These originated from 699 unique collection sites, constitut-  
249 ing an average contribution of  $\approx 8$  accessions per site. The distribution of accession numbers per  
250 collection site (Fig. S1) revealed several locations that contributed a large number (up to 619) of  
251 accessions to the collection, suggesting that multiple accessions from a region were aggregated  
252 into a single georeference. To purge the data set of accessions with unreliable geographic informa-  
253 tion, we checked locations with  $\geq 20$  accessions and found that georeferences were partly assigned  
254 based on provenance from cities, districts or even provinces ([https://npgsweb.ars-grin.gov/  
255 gringlobal/search.aspx?](https://npgsweb.ars-grin.gov/gringlobal/search.aspx?)). We removed 1,704 accessions (29%) from ten collection sites that  
256 were considered too large for a reliable inference of environmental adaptation (Fig. S1).

257

## 258 Identification of Candidate Accessions for the TPE

259 By analyzing climate data from the geographic origin of accessions, we aimed at selecting accessions  
260 pre-adapted to cool and high latitude environments of Central Europe, and to identify the selective  
261 environmental factors acting during the soybean cropping season from May to September that  
262 characterize the DPE and TPE. Most environmental variables were strongly correlated with each  
263 other (Fig. S2 - S4). A PCA summarized 71.8% of the total environmental variation among  
264 collection sites in the first two principal components (PCs) (Fig. 1). Latitude and temperature based  
265 variables were strongly correlated with the first PC, while precipitation based variables related to  
266 the first and the second PC (Fig. S5 and S6). The first PC separated cooler from warmer regions  
267 of origin. To identify locations with accessions suitable for cultivation in Europe, we projected  
268 the European soybean cultivation environments onto the multivariate DPE to relate the TPE to the  
269 DPE (Polygons in Fig. 1). The projection shows that current CEU environments cluster in a narrow  
270 environmental range of less than 3,000 CHUs that includes a small proportion of provenances.  
271 Climate projections for 2070 indicate an average increase of more than 500 CHUs during the  
272 soybean cropping season in the TPE (Fig. S7). Even these conditions in the TPE exclude the  
273 majority of accessions because they originate from warmer regions with >3,500 CHUs. But the  
274 overlap of DPE and TPE with respect to temperature and other environmental variables increased  
275 and included North-Eastern China, Northern Japan, the Himalayas and Russia. The latter regions  
276 also contributed accessions from areas that appear to be highly unfavorable for soybean cultivation.  
277 To select potentially suitable accessions for cultivation in CEU, we included 123 environments with  
278 a position of  $\geq 5$  on the first PC (grey dashed line in Fig. 1) that provided 523 accessions with  
279 potential beneficial variation for abiotic adaptation to CEU (Fig. 2).

280 Only  $\approx 20\%$  of accessions from the USDA *Introduced G. max* collection were georeferenced and  
281 included in the above analysis of environmental variation in the DPE. However, the complete col-  
282 lection was categorized for maturity group, which is a proxy for the photo-thermal requirements  
283 of accessions and georeferenced accessions show a strong correlation between CHUs and their  
284 maturity group classification (Fig. S11). Accessions from early maturity groups originate from en-

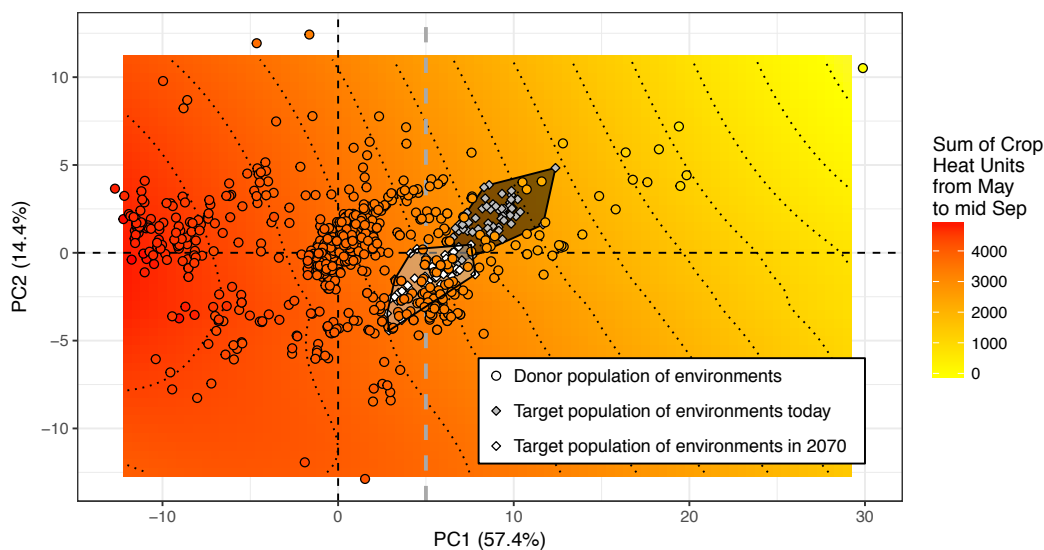

**Fig. 1.** Principal component analysis of environmental variables obtained from *G. max* collection sites to characterize the donor population of environments (DPE). The color of collection sites corresponds to the sum of Crop Heat Units (CHUs) of the soybean cultivation season from May to mid September as a site-specific estimate of available temperatures. Contour lines represent bins of 400 CHUs. Current (grey) and future (white) climatic conditions in Central European soybean growing environments are included as illustrative observations. The environmental scopes of Central European scenarios (today and in 2070) are indicated with polygons.

285 vironments that resemble CEU e.g. in terms of temperature while late maturing accessions originate  
286 from warmer regions. We also included accessions without georeferences and no environmental  
287 data, but were classified as early maturing (maturity groups 000-I) and potentially suitable for cul-  
288 tivation in CEU. By combining accessions selected based on environmental data or maturity group  
289 classifications, we constructed an 'environmental precore collection' of 3,663 accessions (Tables 3  
290 and 4).

## 292 Genomic footprints of environmental adaptation

293 To test whether soybean accessions are locally adapted to their original cultivation environment, we  
294 searched for genomic regions with allele frequency differences between the 3,663 environmental  
295 precore accessions and the remaining 13,354 USDA *Introduced G. max* accessions. The BAYPASS  
296 program identified a total of 52 genomic regions with a stronger genetic differentiation (i.e. higher

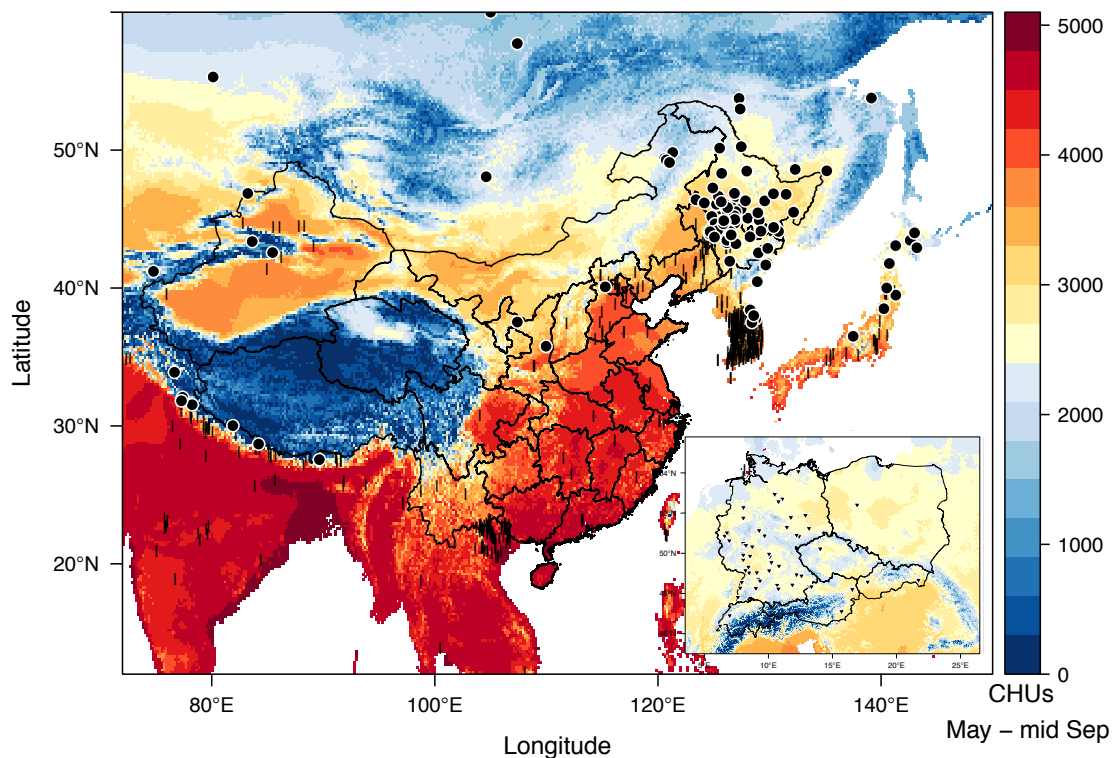

**Fig. 2.** Collection sites of *G. max* germplasm in the *Donor Population of Environments*: Filled dots represent sites that were identified as donors of candidate accessions for CEU. Vertical lines represent sites which were not selected to contribute germplasm. Colouring represents estimates of available temperatures during the soybean season in Crop Heat Units. The inset shows the *Target Population of Environments* (current situation) with triangles indicating the extent of soybean cultivation in CEU based on soybean variety testing locations.

297 *XtX* values) than expected given the population structure (Fig. 3). These regions likely reflect genetic  
298 differentiation due to local adaptation because they harbor several well characterized maturity genes  
299 of soybean, including *E1 - E3* on chromosomes 6, 10 and 19, which are three out of four cloned  
300 genes known to be major determinants of soybean adaptation to latitudinal zones (Jiang et al.  
301 2014). On chromosome 19, a strongly differentiated region harbors *Dt1*, which is an ortholog of the  
302 *Arabidopsis thaliana TFL1* gene. In soybean, this gene controls the agronomically important trait  
303 indeterminacy and affects the length of flowering and reproductive period, which impacts plant  
304 height and maturity (Liu et al. 2010). The strongest differentiation occurs in a genomic region that  
305 contain the *Pdh1* and *GmFT2a* genes. The *pdh1* allele conveys shattering resistance and has been

306 hypothesized crucial for soybean adaptation to Northern and semi-arid environments as opposed to  
307 humid South Asian environments where selection on pod dehiscence was more relaxed (Funatsuki  
308 et al. 2014). *GmFT2a* is a homolog of *Arabidopsis FLOWERING LOCUS T* (Sun et al. 2011)  
309 that has been identified as soybean maturity locus *E9* (Zhao et al. 2016). Additional significantly  
310 differentiated genomic regions harbor genes for which a role in abiotic adaptation of soybean  
311 has been demonstrated or postulated (Tab. 1 and S2). Phenotypic traits controlled by these genes  
312 include adaptation to photoperiod, heat, drought and cold stress. The limited marker density of the  
313 SoySNP50K array did not allow a fine-scaled mapping of differentiation signals, but in summary  
314 provides evidence that the environmental precore collection reflects such an adaptation. It also  
315 illustrates the possibility for mining the precore accessions for further traits that might not yet  
316 have been introduced into CEU breeding but could benefit soybean cultivation in cold and high-  
317 latitude environments. We used loci known to control environmental adaptation (i.e. *Dt1*, *E1-E3*,  
318 *E9* and *Pdh1*) to test whether genetic differentiation caused by local adaptation is better identified  
319 by environmental parameters or maturity group ratings. In general, genome scans comparing early  
320 maturing accessions (MG 000 to I) to late material (MG II to X) and comparing accessions of  
321 CEU-like origin to accessions of non CEU-like origin produced very similar results (Fig. S16).  
322 One exception was the *E1* locus region that exhibited a weaker differentiation signal in the BAYPASS  
323 run with accessions grouped solely based on environmental data as accessions of CEU-like origin  
324 were not necessarily of early maturity. This may indicate imprecise or incorrect georeferencing,  
325 which puts late maturing accessions in the wrong environments. On the other hand, these accessions  
326 might have acquired unique adaptation strategies that would not be identified by solely focusing on  
327 early maturing accessions. Therefore we decided to retain the respective accessions in the precore.

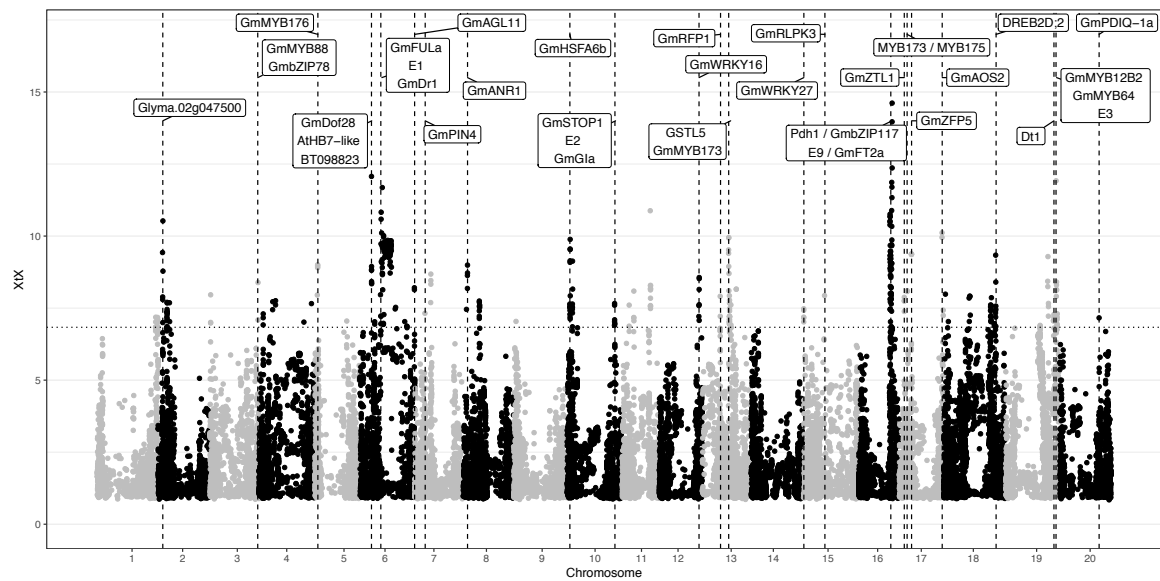

**Fig. 3.** Genome-wide differentiation between precore and non-candidate accessions estimated with BAYPASS. Significantly differentiated regions are located above the dotted horizontal line which represents the POD 99% quantile of  $XtX$  values. Labels indicate genes that are located within significantly differentiated regions and known or hypothesized to be involved in abiotic adaptation and which are located within significantly differentiated regions. Chromosome-level plots are provided in Fig. S12 - S15. Candidate genes and their function are listed in Tab. 1 and Tab. S2.

**TABLE 1.** Overview of genomic regions significantly differentiated between the environmental precore and remaining accessions of the USDA *Introduced G. max* collection with proximity to known or hypothetical genes for abiotic adaptation. Gene functions are provided in Tab. S2.

| Marker      | XtX      | Chr | Pos        | <i>N</i> genes<br>±1Mb | Candidate gene*                   | Gene pos                                                                      |
|-------------|----------|-----|------------|------------------------|-----------------------------------|-------------------------------------------------------------------------------|
| ss715580458 | 7.18     | 1   | 54,584,027 | 23                     | GmANS2<br>GmANS3<br>GmSGR2        | 54,530,596 : 54,532,594<br>54,530,547 : 54,532,598<br>54,554,346 : 54,556,366 |
| ss715582735 | 10.53    | 2   | 4,482,526  | 20                     | Glyma.02g047500                   | 4,373,609 : 4,374,901                                                         |
| ss715586578 | 8.39     | 3   | 44,888,926 | 22                     | GmMYB88<br>GmbZIP78               | 44,634,162 : 44,635,400<br>45,015,664 : 45,021,621                            |
| ss715587948 | 7.30     | 4   | 4,043,556  | 9                      | GmHSFA2                           | 4,216,891 : 4,218,094                                                         |
| ss715592648 | 9.99     | 5   | 2,624,122  | 23                     | GmMYB176                          | 2,802,638 : 2,804,766                                                         |
| ss715590444 | 7.05     | 5   | 29,852,798 | 4                      | GmPM29                            | 29,765,494 : 29,766,379                                                       |
| ss715592720 | 12.07    | 6   | 10,851,807 | 24                     | GmDof28<br>AtHB7-like<br>BT098823 | 10,834,411 : 10,835,873<br>11,001,256 : 11,002,690<br>11,087,031 : 11,088,904 |
| ss715593866 | 11.68    | 6   | 20,940,014 | 4                      | GmFULa<br>E1<br>GmDr1             | 19,584,069 : 19,590,900<br>20,207,077 : 20,207,940<br>20,530,825 : 20,534,411 |
| ss715595268 | 8.21     | 6   | 50,979,817 | 8                      | GmAGL11                           | 51,206,358 : 51,214,568                                                       |
| ss715599060 | 7.32     | 7   | 9,552,345  | 8                      | GmPIN4                            | 9,785,659 : 9,788,973                                                         |
| ss715602532 | 8.99     | 8   | 4,746,918  | 27                     | GmANR1                            | 4,783,892 : 4,786,796                                                         |
| ss715606091 | 9.89     | 10  | 2,836,780  | 19                     | GmHSFA6b                          | 2,576,457 : 2,577,884                                                         |
| ss715607376 | 7.66     | 10  | 44,420,445 | 22                     | DQ075204<br>GmSTOP1<br>E2 / GmGla | 44,392,255 : 44,401,221<br>44,733,937 : 44,735,540<br>45,294,735 : 45,316,121 |
| ss715612745 | 8.56     | 12  | 37,306,504 | 30                     | GmWRKY16                          | 37,131,311 : 37,133,954                                                       |
| ss715616725 | 7.91     | 13  | 16,852,674 | 9                      | GmRFP1                            | 17,176,807 : 17,178,478                                                       |
| ss715614138 | 9.95     | 13  | 24,850,013 | 7                      | GSTL5                             | 24,798,696 : 24,801,446                                                       |
| ss715614348 | 7.61     | 13  | 26,865,258 | 9                      | GmMYB173                          | 26,688,360 : 26,690,995                                                       |
| ss715621196 | 7.48     | 15  | 194,375    | 1                      | GmWRKY27                          | 290,660 : 292,140                                                             |
| ss715621150 | 7.93     | 15  | 19,649,749 | 8                      | GmRLPK3                           | 19,977,272 : 19,982,301                                                       |
| ss715624069 | 10.76    | 16  | 29,256,979 | 17                     | Pdh1<br>GmbZIP117                 | 29,960,568 : 29,967,155<br>29,960,723 : 29,966,796                            |
| ss715624382 | 14.61    | 16  | 31,208,131 | 7                      | E9 / GmFT2a                       | 31,109,978 : 31,114,934                                                       |
| ss715627971 | 7.87     | 17  | 4,779,185  | 27                     | GmZTL1                            | 4,745,075 : 4,749,003                                                         |
| ss715628182 | 8.11     | 17  | 7,525,172  | 19                     | MYB173 / MYB175                   | 7,393,424 : 7,395,444                                                         |
| ss715625789 | 9.38     | 17  | 11,482,490 | 17                     | GmZFP5                            | 11,560,483 : 11,561,457                                                       |
| ss715627703 | 10.11    | 17  | 40,082,518 | 15                     | GmAOS2                            | 40,223,942 : 40,225,689                                                       |
| ss715631394 | 9.337971 | 18  | 48,623,829 | 12                     | DREB2D;2                          | 49,030,874 : 49,032,925                                                       |
| ss715635425 | 7.28     | 19  | 45,204,441 | 17                     | Dt1                               | 45,183,675 : 45,184,980                                                       |
| ss715635641 | 11.92    | 19  | 47,194,890 | 23                     | GmMYB12B2<br>GmMYB64<br>E3        | 47,123,500 : 47,124,980<br>47,439,602 : 47,441,444<br>47,633,059 : 47,641,958 |
| ss715637729 | 7.16     | 20  | 36,692,059 | 15 13                  | Gmpdiq-1a                         | 36,705,455 : 36,711,658                                                       |

\*Naming according to [www.soybase.org](http://www.soybase.org) (Grant et al. 2010)



## 328 Construction of core collections

329 Since the environmentally defined precore comprised 3,663 accessions, we constructed core col-  
330 lections comprising 5% and 10% of the precore accessions to obtain manageable subsets for further  
331 evaluation by breeders and researchers.

332

### 333 Evaluation of Core Subset Optimization Strategies

334 We compared strategies that maximized allelic diversity within core collection accessions or max-  
335 imized genetic distance between core entries, as well as a joint maximization of both parameters.  
336 As shown before (Thachuk et al. 2009), a combination of both parameters revealed a trade-off  
337 because the maximization of one parameter reduced the other (Fig. S17). Therefore, maximizing  
338 each parameter separately is the best approach for a given sampling objective (Fig. 4).

339

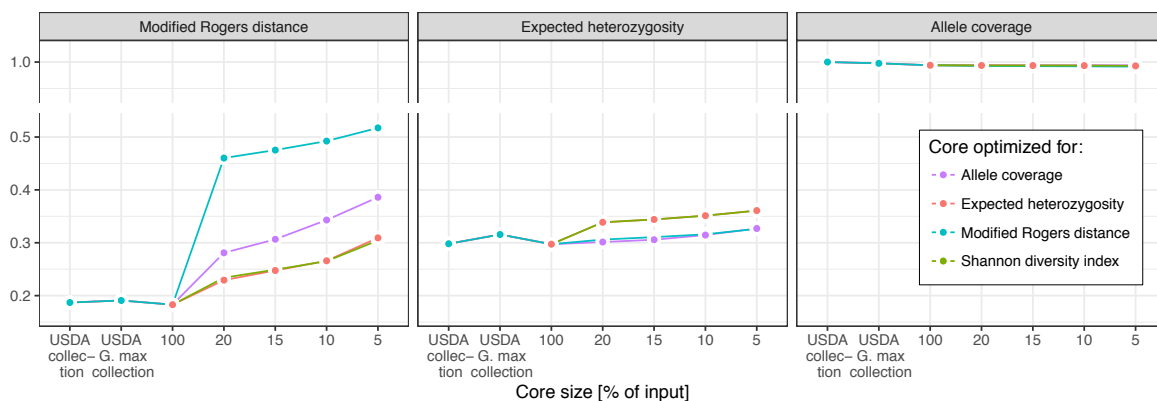

**Fig. 4.** Genetic distance and allelic diversity preserved in cores of varying size with varying optimization objectives. Core size '100' denotes the 3,663 precore accessions. Values on the y-axis refer to the respective facet label and all variables are defined in [0,1]. Core subset optimization based on Modified Rogers distance was most effective in forming cores consisting of distinct accessions.

340 Importantly, both approaches retained >99% of SNP alleles in all core collections. The loss of  
341 <1% of alleles resulted from the removal of *G. soja* specific alleles and the environmental stratifica-  
342 tion (Fig. S18). We compared two measures of allelic diversity,  $H_{exp}$  and Shannon's diversity index.

343 Both gave very similar results with respect to diversity within and distance between accessions,  
344 and were increased in core collections (Fig. 4). The genetic distance between accessions increased  
345 more strongly in core collections than allelic diversity and this behavior was independent of the  
346 optimization strategy. For example, in the most successful scenario the average minimum Modified  
347 Rogers distance increased 1.5-fold in the 5% core compared to the precore whereas  $H_{exp}$  differed  
348 only marginally (Fig. 4). Our estimates of allelic diversity (Table S3) might show an ascertainment  
349 bias caused by the design the SoySNP50K array if it includes SNPs that were preselected for high  
350 minor allele frequencies to guarantee high informativeness (Song et al. 2013). This most likely  
351 contributed to the modest increase of  $H_{exp}$  in core subset optimization (Malomane et al. 2018). By  
352 contrast, core subset optimization based on Modified Rogers distance purged highly similar acces-  
353 sions from subsets and was effective in forming cores consisting of distinct accessions (Fig. 4). We  
354 therefore based the core subset optimization exclusively on the maximization of genetic distance  
355 between core accessions.

356

### 357 *Evaluation of Core Subset Sampling Strategies*

358 The construction of core collections resulted in an underrepresentation of early maturing accessions  
359 (Fig. 5A and S19) because average redundancy levels were higher in early than within late maturing  
360 accessions (Fig. S20). Since early maturity is an important trait for CEU soybean breeding we ex-  
361 plored sampling strategies based on a stratification by maturity group designation that favored the  
362 selection of early accessions. Any stratification prior to optimization represents a trade-off between  
363 accepting higher levels of redundancy in exchange for gaining improved representation in the strati-  
364 fication criterion. The best relative representation across all maturity groups was therefore observed  
365 for subsets sampled according to a classic stratification strategy (Fig. 5A) of independent sampling  
366 within three groups of accessions and aggregating selected accessions into a final core (Table S4).  
367 But it also resulted in the lowest level of realized genetic distance between accessions (Fig. 5B)  
368 and reflects that accessions in one subcore can be similar to accessions in another, which reduces

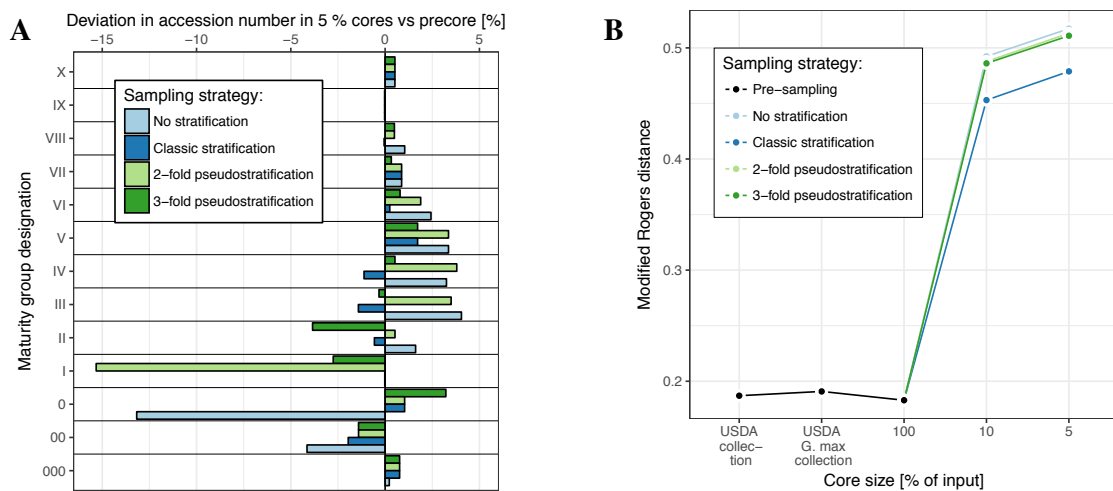

**Fig. 5. A:** Evaluation of different core sampling strategies with regards to the preservation of MG fractions in 5% cores relative to the precore. **B:** Increase in genetic distance between core accessions measured by Modified Roger's distance. Among different sampling strategies, the 3-fold pseudostratification\* showed good results in terms of favouring early maturing material while maintaining high average minimum genetic distance between accessions.

\*Consecutive sampling within groups of maturity categories 000 - 0, 000 - I, 000 - X with fixation of already picked accessions (Tab. S4)

369 the overall diversity of the complete set. To increase genetic distance we adopted two pseudostrat-  
 370 ification sampling strategies that allowed to coordinate sub-core subset selection in a consecutive,  
 371 step-wise fashion that ensured the selection of complementary sub-cores (Table S4). Sampling with  
 372 pseudostratification resulted in cores that in terms of genetic dissimilarity between accessions were  
 373 comparable to the no stratification benchmark. The 2-fold pseudostratification however failed in  
 374 ensuring a good level of representation for accessions of maturity group I, presumably because  
 375 accessions of this group on average are more similar to accessions of maturity groups 000 - 0 than  
 376 to later accessions. The 3-fold pseudostratification resulted in a high average minimum genetic  
 377 distance between accessions in the final set and also maintained acceptable levels of representation  
 378 over all maturity groups. We therefore used the 3-fold pseudostratification to construct the final  
 379 core collections with 5% and 10% of individuals from the precore collection.

380

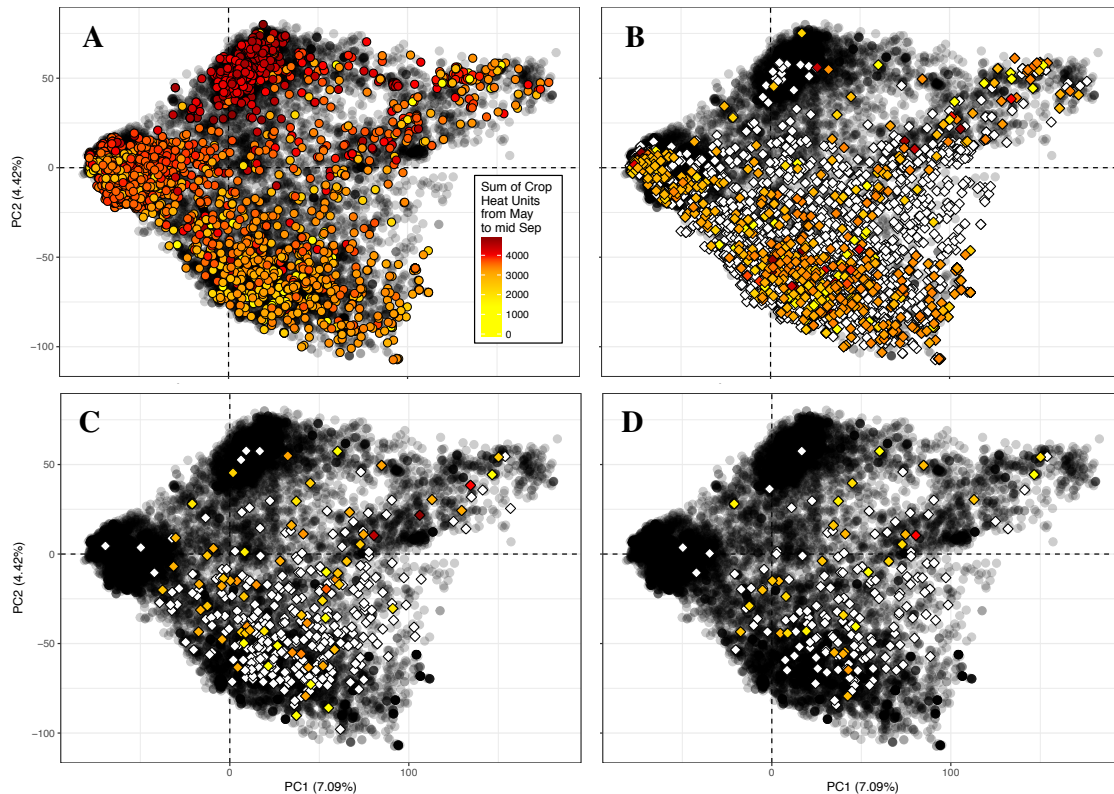

**Fig. 6.** Principal component analysis summarizing the genetic structure in > 17,000 *G. max* accessions conserved in the *Introduced G. max* subcollection of the USDA Soybean Germplasm Collection. Each dot represents one accession. **A:** Accessions with collection site information available in their passport data are highlighted according to temperature supply at origin. **B:** 3,663 accessions selected for the environmental precore based on environmental data (coloured) and / or early maturity group ratings (white) are highlighted. **C:** 366 entries of the 10% core are highlighted. **D:** 183 entries of the 5% core are highlighted.

381 *Further Effects of Core Sampling: Shifts in Germplasm Composition and Allele Frequencies*

382 The reduction of the number of accessions through our environmental stratification and the selection  
383 of core subsets maximized for genetic diversity was naturally accompanied by changes in the  
384 geographic and genomic composition of the respective accession population at each stage of the  
385 core formation process (Fig. 2, 6 and S21). The reduction of genetic redundancy among core entries  
386 furthermore resulted in genome wide changes in population-wise allele frequencies (Fig. S22).  
387 These mainly affected loci with low minor allele frequencies in the environmental precore by  
388 elevating the frequencies of the respective alleles in the cores (Fig. 8). Changes in MAFs between  
389 the 3,663 precore accessions and the core collection entries however never exceeded 0.25 (Fig. 22)  
390 and the groups showed a comparable distribution along the first two components of a PCA (Fig. 7).

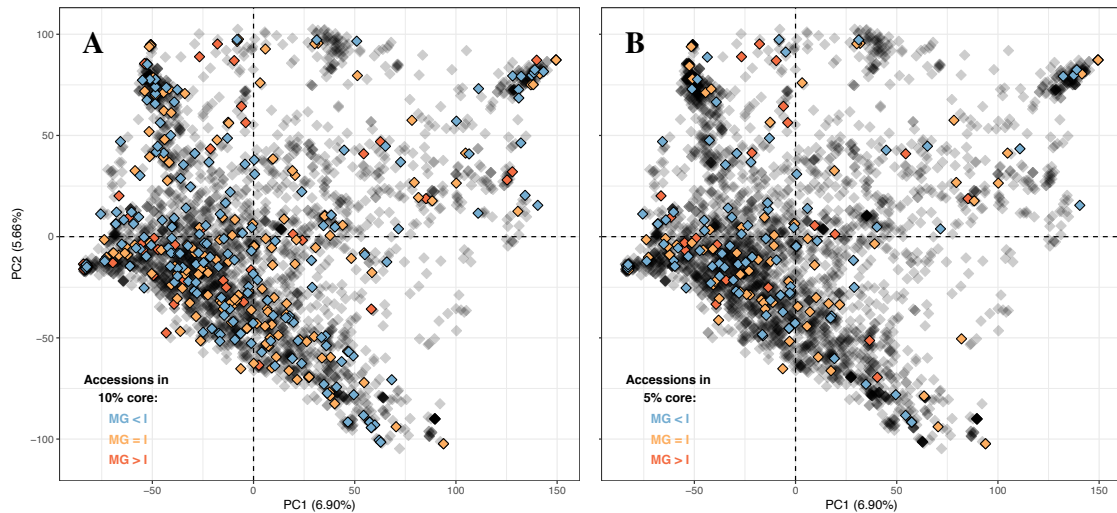

**Fig. 7.** Principal component analysis summarizing the genetic structure among 3,663 precore accessions shows an even spatial distribution of the core entries: core accessions are highlighted according to maturity group ratings. **A:** 366 entries of the 10% core. **B:** 183 entries of the 5% core.

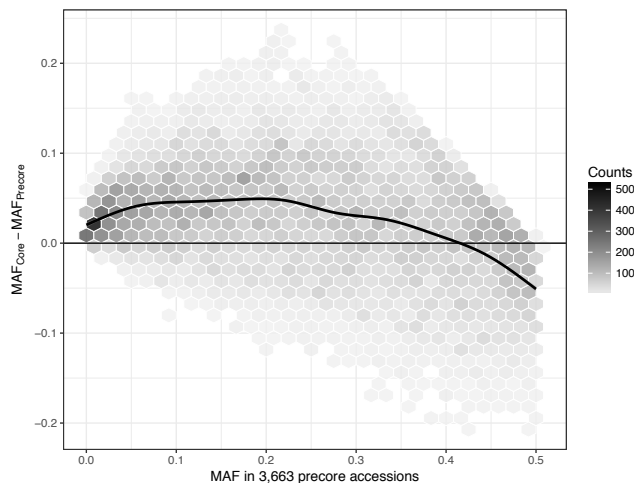

**Fig. 8.** Pairwise comparison of MAFs in the precore versus the MAF change from precore to 5% core: Core subset optimization resulted in genome wide MAF changes through enrichment of low frequency variants in the core. Fig. S22 provides a more detailed overview on MAF changes.

391 Also the genetic basis of the presumed environmental adaptation was unaffected by the core  
392 formation process and well preserved in the cores as can be observed in a comparison of genetic  
393 differentiation between core, precore and non-precore accessions (Fig. S16).

### 394 *Robustness of Core Sampling*

395 With 3,663 precore accessions,  $\binom{3,663}{183} = 1.2 \times 10^{314}$  core subsets with 5% ( $n = 183$ ) and  
396 10% ( $n = 366$ )  $\binom{3,663}{366} = 1.6 \times 10^{515}$  accessions are possible. To find the best core, stochastic  
397 algorithms to approximate the optimal solution as implemented in *Core Hunter* need to be used.  
398 Independent runs of these search algorithms may produce different results, but using a fixed seed  
399 to define the starting point ensures the reproducibility of the optimization solution as long as the  
400 termination criteria are kept constant. All results presented so far regarded core subset sampling  
401 solutions derived from optimization runs with a fixed seed of one. We verified the stability of our  
402 results from runs with fixed seeds by performing re-sampling with random seeds for five additional  
403 runs. Average levels of genetic distances between accessions in these runs were highly similar to the  
404 previous runs. The intersection of all 5% cores included the same 82 out of 183 (45%) and 223 out  
405 of 366 10%-core accessions (61%). Only a small proportion of accessions (9% / 5% in 5%/10%  
406 cores, respectively) was restricted to a single core subset and seemingly interchangeable through  
407 genetically similar entries (Table 2). Core subsets differing in sampling intensities were comparable  
408 on an individual level too, with 134 accessions of the 5% core having been also selected for the  
409 10% core solution.

410 We followed Odong et al. (2013) and investigated how the formation of core collections depends  
411 on the marker set used by randomly dividing our marker set in a training set and an evaluation  
412 set of equal size (split-half analysis). The training set was used to sample cores with varying  
413 sampling intensities and the average minimum genetic distance between core entries was subse-  
414 quently evaluated independently based on both marker sets and based on all available markers.  
415 Estimates of genetic distance were highly similar in all comparisons of the same sampling intensity  
416 and did not differ between marker sets ( $\Delta MR \leq 0.00032$ , data not shown). This suggests that  
417 our SNP marker set was sufficiently dense to warrant for the robust estimation of genetic distance  
418 and the presented core solutions can thus be considered stable within the disparities discussed above.

419

**TABLE 2.** Comparison of core collection sampling alternatives: Sampling intensity, core size, averaged minimum Modified Rogers distance between core accessions sampled with fixed seed, mean and standard deviation of averaged minimum Modified Rogers distance between core accessions of all sampled cores (including cores sampled with random seed), proportion of accessions that jointly occur in all sampled cores, proportion of accessions private to one core.

| Core | N   | MR     | $\overline{MR}$ | SD     | $\bigcap_{i=1}^6 Core_i$ | $\bigcap_{i=1}^6 Core_i = \emptyset$ |
|------|-----|--------|-----------------|--------|--------------------------|--------------------------------------|
| 5%   | 183 | 0.5110 | 0.5113          | 0.0003 | 0.45                     | 0.09                                 |
| 10%  | 366 | 0.4860 | 0.4866          | 0.0003 | 0.61                     | 0.05                                 |

420 *Evaluation of phenotypic properties*

421 We assessed changes in major phenotypic characteristics of accession sets throughout the core  
422 collection formation process, i.e. from the *Introduced G. max* subcollection over the environmental  
423 precore to the actual core subsets. The largest phenotypic changes were caused by the environmental  
424 stratification that removed most accessions of maturity group  $\geq II$  and therefore the majority of  
425 the original collection (Table 3). As a consequence, variation in phenotypic traits of the precore  
426 and core subsets differed substantially from the *Introduced G. max* collection while the smaller  
427 core collections preserved the phenotypic variation of the precore (Table 4). Regarding the average  
428 phenotypic performance, seed weight was reduced in the cores compared to the precore while  
429 the seed yields did not differ significantly and seed components (protein and oil content) varied  
430 partially. A reduction in seed weight may result from the marker-based selection of more diverse  
431 exotic accessions instead of more recently adapted material with larger seeds. Cores sampled with  
432 random seeds produced similar results (Table S5).

**TABLE 3.** Composition of the *Introduced G. max* sub-collection with regards to maturity group ratings and the shift towards earlier maturity in precore accessions and core entries.

| Group                    | N      | 000 | 00  | 0     | I     | II    | III   | IV    | V     | VI    | VII | VIII | IX  | X   |
|--------------------------|--------|-----|-----|-------|-------|-------|-------|-------|-------|-------|-----|------|-----|-----|
| <i>G. max</i> collection | 17,189 | 132 | 473 | 1,063 | 1,563 | 1,756 | 1,639 | 3,896 | 2,480 | 1,466 | 882 | 963  | 751 | 123 |
| Precore                  | 3,663  | 132 | 472 | 1,063 | 1,562 | 201   | 112   | 61    | 37    | 11    | 8   | 2    | 1   | 1   |
| 10% core                 | 366    | 15  | 36  | 117   | 155   | 5     | 11    | 8     | 9     | 5     | 2   | 2    | 0   | 1   |
| 5% core                  | 183    | 8   | 21  | 59    | 73    | 3     | 5     | 4     | 5     | 2     | 1   | 1    | 0   | 1   |

**TABLE 4.** Selected phenotypic properties of the *Introduced G. max* sub-collection, the environmental precore and the core collections. Differences between groups are reported as significant at a p-value < 0.05.

| Group                    | N      | $\overline{\text{Yield}}$<br>[Mg/ha] | Var                 | $\overline{\text{Seed weight}}$<br>[cg/seed] | Var                | $\overline{\text{Protein}}$<br>[%] | Var                 | $\overline{\text{Oil}}$<br>[%] | Var                |
|--------------------------|--------|--------------------------------------|---------------------|----------------------------------------------|--------------------|------------------------------------|---------------------|--------------------------------|--------------------|
| <i>G. max</i> collection | 17,189 | 1.954 <sup>a</sup>                   | 0.503 <sup>a</sup>  | 15.31 <sup>a</sup>                           | 29.53 <sup>a</sup> | 44.33 <sup>a</sup>                 | 7.98 <sup>a</sup>   | 17.81 <sup>a</sup>             | 4.36 <sup>a</sup>  |
| Precore                  | 3,663  | 2.283 <sup>b</sup>                   | 0.479 <sup>b</sup>  | 15.63 <sup>b</sup>                           | 16.41 <sup>b</sup> | 42.69 <sup>b</sup>                 | 7.23 <sup>b</sup>   | 18.88 <sup>b</sup>             | 3.04 <sup>b</sup>  |
| 10% core                 | 366    | 2.262 <sup>b</sup>                   | 0.547 <sup>ab</sup> | 14.67 <sup>c</sup>                           | 13.36 <sup>b</sup> | 43.18 <sup>c</sup>                 | 6.88 <sup>b</sup>   | 18.53 <sup>c</sup>             | 3.30 <sup>b</sup>  |
| 5% core                  | 183    | 2.149 <sup>b</sup>                   | 0.578 <sup>ab</sup> | 13.96 <sup>c</sup>                           | 16.25 <sup>b</sup> | 43.30 <sup>bc</sup>                | 10.05 <sup>ab</sup> | 18.21 <sup>ac</sup>            | 4.77 <sup>ab</sup> |



## 433 DISCUSSION

### 434 *Creation of Core Collections*

435 By combining the *Focused Identification of Germplasm Strategy* (FIGS) with core collection  
436 methodology, we identified subsets of genebank accessions from a large soybean germplasm col-  
437 lection (N > 17,000) that are likely pre-adapted to cultivation in Central Europe while simultaneously  
438 conserving a high level of genetic diversity. To establish these core collections, we first defined a  
439 precore of 3,663 accessions with potential abiotic adaptation to CEU based on environmental data.  
440 This precore was subsequently reduced to two core collections of 183 and 366 accessions (5% and  
441 10% of the precore, please consult the supplementary information for further core accession details)  
442 by limiting genetic redundancies among core entries. We quantified the success of this approach at  
443 each step of the process and found strong evidence for the enrichment of adaptive genetic variation  
444 for abiotic adaptation to high-latitude cold regions throughout the genome (Fig. 3, S12 to S16,  
445 Tab. 1 and Tab. S2).

### 447 *Limitations and Evidence for Enrichment of Environmental Adaptation*

448 By inferring local adaptation from environmental data we followed FIGS methodology that is  
449 based on the assumption that landraces adapted to the environment in which they were originally  
450 cultivated by natural and artificial selection (Street et al. 2008; Sanders et al. 2013). Knowledge  
451 about the geographic origin of germplasm is therefore a key parameter in the successful application  
452 of FIGS for abiotic traits. For our implementation of FIGS in the USDA Soybean Germplasm Col-  
453 lection, the origin of accessions was approximated by the georeference for the respective collection  
454 sites recorded in the passport data. This information was only available for parts of the collection  
455 and in many cases seemed to be an approximate reconstruction of the historic collection sites,  
456 sometimes with limited accuracy. Inaccurate georeference information lead to false associations  
457 of accessions with environmental data and even though we removed the least reliable collection  
458 site - origin misspecifications, this certainly led to the inclusion of some non-adapted accessions

459 into the environmental precore. Another limitation concerns the granularity of the environmental  
460 data: The spatial resolution and categorical scope of WorldClim data is sufficiently detailed, but  
461 the temporal resolution is restricted to monthly averages. Since records on local cropping practices  
462 such as the period of cultivation of landraces in their native environment are lacking too, a detailed  
463 reconstruction of the agro-ecological conditions that influenced local adaptation was not possible.  
464 Missing georeferences for the majority of accessions were even more limiting, which required us  
465 to use maturity group assignments of these accessions as sole proxy for environmental adaptation.  
466 Although field trials for the maturity group classification were conducted in North America, we  
467 consider using these information suitable for this purpose because of the high heritability of this  
468 trait (Xavier et al. 2018).

469 To test whether the selection of the precore accessions led to an enrichment of abiotic adaptation  
470 to CEU environments, we conducted a selection scan for genetic differentiation between precore  
471 accessions and non-precure accessions. Although the marker density of the SoySNP50K array was  
472 too low to pinpoint differentiation at the level of single genes, we found evidence that the selection  
473 based on climate data and maturity group assignments targets genomic regions involved in abiotic  
474 adaptation and enriches genetic variants which are advantageous for cultivation in CEU in the pre-  
475 core. Highly differentiated regions mainly indicated genomic regions that harbor well-known genes  
476 responsible for photoperiodic adaptation in soybean. This result is expected because the selection  
477 of adapted accessions was partially based on maturity groups that are conditioned by photoperiod  
478 genes. In addition, also new and promising candidate genes for adaptation to abiotic factors like  
479 heat, drought and cold stress were highlighted (Tab. 1 and Tab. S2). Most importantly, these signals  
480 of adaptation were preserved in the core collections (Fig. S16) which indicates that the genetic  
481 variation responsible for this presumed adaptation can be introgressed from core accessions into  
482 CEU elite breeding germplasm.

483

484 *Towards a Characterization of Core Collections*

485 To unlock the full potential of the core accessions, long term dedication of breeders and researchers  
486 for the detailed genotypic and phenotypic characterization of the cores will be necessary. A list of  
487 core entries is included as supplementary information for further reference. Environmental adap-  
488 tation is complex with possibly manifold ways to adapt to the same stress which in a real world  
489 scenario will not be present as a single factor but as a combination of multiple factors. Therefore,  
490 multi-location field trials will be necessary to accurately estimate the level of abiotic adaptation to  
491 CEU environments, complemented by trials with controlled conditions in which the most promising  
492 accessions can be confronted with selected stresses. It should be noted that no accession is likely  
493 to outcompete current CEU varieties per se, but may contribute to improve breeding germplasm.  
494 Detailed phenotyping will identify beneficial variation in landraces for use in soybean prebreeding.  
495 The increasing availability of high-throughput aerial and field-based phenomics technologies holds  
496 great potential in this respect (Furbank and Tester 2011; Araus and Cairns 2014).

497 The efficient introduction of beneficial abiotic adaptation into breeding germplasm via marker  
498 assisted selection or genome editing requires the identification of causal genetic variants. The allele  
499 frequency of causal variants is a major determinant for the detection power in association-mapping  
500 panels (Spencer et al. 2009) and variants with MAF below 5% are usually not considered because  
501 of their low statistical power. Our optimization strategy for the selection of core accessions resulted  
502 in elevated MAF for rare alleles (Fig. 8), which will aid in the discovery of rare traits using modern  
503 phenotyping approaches and provides an increased power to map causal variants despite the fairly  
504 small core collection sizes. Accessions that harbor favorable alleles can be subsequently included  
505 in large multiparent populations for genetic fine-mapping and gene identification (Cockram and  
506 Mackay 2018).

507

508 *Core Collections for a Future Climate*

509 The time span required for the development of new varieties requires long-term planning in an era of  
510 climate change. We therefore selected precore accessions not only using current climate parameters  
511 of the TPE, but also considered climate projections for the year 2070, in which lower precipita-  
512 tion and higher temperatures during the soybean cropping season are expected for CEU (Fig. S7  
513 and S8). These projections suggest that future varieties may not require cold adaptation, but will  
514 have to be highly drought tolerant. It is reasonable to argue that both types of adaptation will  
515 remain relevant because climate estimates are based on long-term averages, whereas short-term  
516 extreme events during the cropping season are frequently limiting crop yields. The future climate  
517 is expected to become more volatile and extreme events more frequent, which will include low  
518 temperatures in the early and high temperatures in the later growing season. The improvement of  
519 crop abiotic adaptation is therefore pivotal to equip agricultural systems with crop varieties for the  
520 future. The novel combination of FIGS and core collection methodology is a promising strategy  
521 to assemble relevant objective driven core collections and to increase the efficiency of germplasm  
522 characterization. Both will aid the identification of alleles for abiotic stress tolerance in order to  
523 complement modern breeding germplasm. Upon discovery, targeted crosses and combinations of  
524 marker-assisted selection and speed breeding or genome engineering can be employed to incorpo-  
525 rate beneficial alleles into modern backgrounds in real-time (Varshney et al. 2018; Watson et al.  
526 2018). Genomic selection has emerged as a strategy to predict complex traits also in genebank  
527 populations (Jarquin et al. 2016; Schnable et al. 2016), but its successful application is challenging  
528 in genetically diverse germplasm collections that are frequently lacking phenotypic characterization  
529 data for traits of interest (Langridge and Waugh 2019). Here, upon their sufficient characterization,  
530 objective driven core collections from FIGS selected germplasm groups have the potential to com-  
531 plement prediction efforts in genebank germplasm for abiotic adaptation by serving as training and  
532 validation populations.

533

534 **AUTHOR CONTRIBUTION STATEMENT**

535 MH and KS designed the study, MH analyzed the data and wrote the first version of the manuscript.

536 MH and KS wrote the final version of the manuscript.

537 **ACKNOWLEDGEMENTS**

538 The authors thank the United States Department of Agriculture (USDA) and the USDA Soybean  
539 Germplasm Collection for their open data and free distribution of germplasm policies that made  
540 this work possible. This work was funded by BMEL Project Sojagenopath (FKZ 2814EPS012).

541 **CONFLICT OF INTEREST STATEMENT**

542 On behalf of all authors, the corresponding author states that there is no conflict of interest.

543

544 **REFERENCES**

545 Araus, J. L. and Cairns, J. E. (2014). “Field high-throughput phenotyping: The new crop breeding  
546 frontier.” *Trends in Plant Science*, 19(1), 52–61.

547 Balko, C., Hahn, V., and Ordon, F. (2014). “Chilling tolerance in soybeans (*Glycine max*) – a  
548 prerequisite for soybean cultivation in Germany.” *Journal of Cultivated Plants*, 66(11), 378–388.

549 Bari, A., Street, K., Mackay, M., Endresen, D. T. F., de Pauw, E., and Amri, A. (2012). “Fo-  
550 cused identification of germplasm strategy (FIGS) detects wheat stem rust resistance linked to  
551 environmental variables.” *Genetic Resources and Crop Evolution*, 59(7), 1465–1481.

552 Bemer, M., Van Mourik, H., Muiño, J. M., Ferrándiz, C., Kaufmann, K., and Angenent, G. C. (2017).  
553 “*FRUITFULL* controls *SAUR10* expression and regulates Arabidopsis growth and architecture.”  
554 *Journal of Experimental Botany*, 68(13), 3391–3403.

555 Bernard, R. L. (1971). “Two Major Genes for Time of Flowering and Maturity in Soybeans.” *Crop*  
556 *Science*, 11, 242–244.

557 Beukelaer, H. D., Davenport, G. F., De Meyer, G., and Fack, V. (2017a). “JAMES: An object-

- 558 oriented Java framework for discrete optimization using local search metaheuristics.” *Software -*  
559 *Practice and Experience*, 47(6), 921–938.
- 560 Beukelaer, H. D., Davenport, G. F., and Fack, V. (2017b). “Multi-Purpose Core Subset Selection,  
561 <[www.corehunter.org](http://www.corehunter.org)>.
- 562 Beukelaer, H. D., Smýkal, P., Davenport, G. F., and Fack, V. (2012). “Core Hunter II: fast core  
563 subset selection based on multiple genetic diversity measures using Mixed Replica search.” *BMC*  
564 *Bioinformatics*, 13(1), 312.
- 565 Bhullar, N. K., Street, K., Mackay, M., Yahiaoui, N., and Keller, B. (2009). “Unlocking wheat  
566 genetic resources for the molecular identification of previously undescribed functional alleles at  
567 the *Pm3* resistance locus.” *Proceedings of the National Academy of Sciences of the United States*  
568 *of America*, 106(23), 9519–9524.
- 569 BMEL (2016). “Ackerbohne, Erbse & Co., <[https://www.bmel.de/SharedDocs/  
570 Downloads/Broschueren/EiweisspflanzenstrategieBMEL.pdf?{\\_}{\\_}blob=  
571 publicationFile](https://www.bmel.de/SharedDocs/Downloads/Broschueren/EiweisspflanzenstrategieBMEL.pdf?{_}{_}blob=publicationFile)>.
- 572 Bootsma, A., McKenney, D. W., Anderson, D., and Papadopol, P. (2007). “A re-evaluation of crop  
573 heat units in the maritime provinces of Canada.” *Canadian Journal of Plant Science*, 87(2),  
574 281–287.
- 575 Brown, D. and Bootsma, A. (1993). “Crop Heat Units for Corn and Other Warm Season  
576 Crops in Ontario.” *Report No. Factsheet No. 93-119*, Ministry of Agriculture and Food  
577 Ontario, <[https://www.sojaforderring.de/wp-content/uploads/2014/02/Berechnung-CHU-Uni-  
578 Guelph-Ontario.pdf](https://www.sojaforderring.de/wp-content/uploads/2014/02/Berechnung-CHU-Uni-Guelph-Ontario.pdf)>.
- 579 Browning, B. L. and Browning, S. R. (2016). “Genotype Imputation with Millions of Reference  
580 Samples.” *American Journal of Human Genetics*, 98(1), 116–126.
- 581 Buzzell, R. I. (1971). “Inheritance of a soybean flowering response to fluorescent-daylength condi-  
582 tions.” *Canadian Journal of Genetics and Cytology*, 13(4), 703–707.
- 583 Cober, E. R., Molnar, S. J., Rai, S., Soper, J. F., and Voldeng, H. D. (2013). “Selection for cold  
584 tolerance during flowering in short-season soybean.” *Crop Science*, 53(4), 1356–1365.

- 585 Cockram, J. and Mackay, I. (2018). “Genetic Mapping Populations for Conducting High-Resolution  
586 Trait Mapping in Plants.” *Plant Genetics and Molecular Biology*, R. K. Varshney, M. K. Pandey,  
587 and A. Chitkineni, eds., Springer International Publishing, Cham, 109–138.
- 588 Diamond, J. (2002). “Evolution, consequences and future of plant and animal domestication.”  
589 *Nature*, 418(6898), 700–707.
- 590 Dray, S. and Dufour, A.-B. (2007). “The ade4 Package: Implementing the Duality Diagram for  
591 Ecologists.” *Journal of Statistical Software*, 22(4).
- 592 Du, Q. L., Cui, W. Z., Zhang, C. H., and Yu, D. Y. (2010). “*GmRFP1* encodes a previously unknown  
593 RING-type E3 ubiquitin ligase in Soybean (*Glycine max*).” *Molecular Biology Reports*, 37(2),  
594 685–693.
- 595 Endresen, D. T. F. (2010). “Predictive association between trait data and ecogeographic data for  
596 Nordic barley landraces.” *Crop Science*, 50(6), 2418–2430.
- 597 European Soya Declaration (2017). “Common Declaration of Austria, Croatia, Finland, France,  
598 Germany, Greece, Hungary, Italy, Luxemburg, the Netherlands, Poland, Romania, Slo-  
599 vakia and Slovenia European Soya Declaration – Enhancing soya and other legumes cul-  
600 tivation, <[https://www.bmel.de/SharedDocs/Downloads/Landwirtschaft/Pflanze/  
601 SojaErklaerung.pdf?\\_\\_blob=publicationFile](https://www.bmel.de/SharedDocs/Downloads/Landwirtschaft/Pflanze/SojaErklaerung.pdf?__blob=publicationFile)>.
- 602 Fick, S. and Hijmans, R. (2017). “Worldclim 2: New 1-km spatial resolution climate surfaces for  
603 global land areas.” *International Journal of Climatology*, 37(12), 4302–4315.
- 604 Frankel, O. (1984). “Genetic Perspectives of Germplasm Conservation.” *Genetic Manipulation:  
605 Impact on Man and Society*, W. Arber, K. Llimensee, W. Peacock, and P. Stralinger, eds.,  
606 Cambridge University Press, Cambridge, 161–170.
- 607 Funatsuki, H., Kawaguchi, K., Matsuba, S., Sato, Y., and Ishimoto, M. (2005). “Mapping of  
608 QTL associated with chilling tolerance during reproductive growth in soybean.” *Theoretical and  
609 Applied Genetics*, 111(5), 851–861.
- 610 Funatsuki, H., Matsuba, S., Kawaguchi, K., Murakami, T., and Sato, Y. (2004). “Methods for evalu-  
611 ation of soybean chilling tolerance at the reproductive stage under artificial climatic conditions.”

- 612 *Plant Breeding*, 123(6), 558–563.
- 613 Funatsuki, H., Suzuki, M., Hirose, A., Inaba, H., Yamada, T., Hajika, M., Komatsu, K., Katayama,  
614 T., Sayama, T., Ishimoto, M., and Fujino, K. (2014). “Molecular basis of a shattering resistance  
615 boosting global dissemination of soybean.” *Proceedings of the National Academy of Sciences*,  
616 111(50), 17797–17802.
- 617 Furbank, R. T. and Tester, M. (2011). “Phenomics - technologies to relieve the phenotyping bottle-  
618 neck.” *Trends in Plant Science*, 16(12), 635–644.
- 619 Gass, T., Schori, A., Fossati, A., Soldati, A., and Stamp, P. (1996). “Cold tolerance of soybean  
620 (*Glycine max* (L.) Merr.) during the reproductive phase.” *European Journal of Agronomy*, 5(1-  
621 2), 71–88.
- 622 Gautier, M. (2015). “Genome-wide scan for adaptive divergence and association with population-  
623 specific covariates.” *Genetics*, 201(4), 1555–1579.
- 624 Gizlice, Z., Carter, T. E., and Burton, J. W. (1994). “Genetic Base for North American Public  
625 Soybean Cultivars Released between 1947 and 1988.” *Crop Science*, 34(5), 1143–1151.
- 626 Grant, D., Nelson, R. T., Cannon, S. B., Shoemaker, R. C., and (SoyBase) (2010). “SoyBase, the  
627 USDA-ARS soybean genetics and genomics database, <<http://soybase.org>>.
- 628 Günther, T. and Coop, G. (2013). “Robust identification of local adaptation from allele frequencies.”  
629 *Genetics*, 195(1), 205–220.
- 630 Hahn, V. and Würschum, T. (2014). “Molecular genetic characterization of Central European  
631 soybean breeding germplasm.” *Plant Breeding*, 133(6), 748–755.
- 632 Harlan, J. R. (1992). “Space, Time, and Variation.” *Crops & Man*, American Society of Agronomy,  
633 Crop Science Society of America, Madison, WI, Chapter 7, 135 – 155.
- 634 Hijmans, R. J., Cameron, S. E., Parra, J. L., Jones, P. G., and Jarvis, A. (2005). “Very high resolution  
635 interpolated climate surfaces for global land areas.” *International Journal of Climatology*, 25(15),  
636 1965–1978.
- 637 Hui, W., Gel, Y., and Gastwirth, J. (2008). “lawstat: an R package for law, public policy and  
638 biostatistics.” *Journal of Statistical Software*, 28(3), 1–26.



- 639 Hyten, D. L., Song, Q., Zhu, Y., Choi, I.-Y., Nelson, R. L., Costa, J. M., Specht, J. E., Shoemaker,  
640 R. C., and Cregan, P. B. (2006). “Impacts of genetic bottlenecks on soybean genome diversity.”  
641 *PNAS*, 103(45), 16666–16671.
- 642 Iuchi, S., Kobayashi, Y., Koyama, H., and Kobayashi, M. (2014). “*STOP1*, a Cys2/His2 type  
643 zinc-finger protein, plays critical role in acid soil tolerance in Arabidopsis.” *Plant Signaling &*  
644 *Behavior*, 3(2), 128–130.
- 645 Iwasaki, K., Kamauchi, S., Wadahama, H., Ishimoto, M., Kawada, T., and Urade, R. (2009).  
646 “Molecular cloning and characterization of soybean protein disulfide isomerase family proteins  
647 with nonclassic active center motifs.” *FEBS Journal*, 276(15), 4130–4141.
- 648 Jarquin, D., Specht, J., and Lorenz, A. (2016). “Prospects of Genomic Prediction in the USDA  
649 Soybean Germplasm Collection: Historical Data Creates Robust Models for Enhancing Selection  
650 of Accessions.” *G3*, 6(8), 2329–2341.
- 651 Jiang, B., Nan, H., Gao, Y., Tang, L., Yue, Y., Lu, S., Ma, L., Cao, D., Sun, S., Wang, J., Wu,  
652 C., Yuan, X., Hou, W., Kong, F., Han, T., and Liu, B. (2014). “Allelic combinations of soybean  
653 maturity Loci E1, E2, E3 and E4 result in diversity of maturity and adaptation to different  
654 latitudes.” *PLoS ONE*, 9(8), e106042.
- 655 Khazaei, H., Street, K., Bari, A., Mackay, M., and Stoddard, F. L. (2013). “The FIGS (Focused  
656 Identification of Germplasm Strategy) approach identifies traits related to drought adaptation in  
657 *Vicia faba* genetic resources.” *PLOS ONE*, 8(5).
- 658 Kongrit, D., Jisaka, M., Iwanga, C., Yokomichi, H., Katsube, T., Nishimura, K., Nagaya, T., and  
659 Yokota, K. (2007). “Molecular Cloning and Functional Expression of Soybean Allene Oxide  
660 Synthases.” *Bioscience, Biotechnology and Biochemistry*, 71(2), 491–498.
- 661 Kovinich, N., Saleem, A., Arnason, J. T., and Miki, B. (2012). “Identification of two anthocyanidin  
662 reductase genes and three red-brown soybean accessions with reduced anthocyanidin reductase  
663 1 mRNA, activity, and seed coat proanthocyanidin amounts.” *Journal of Agricultural and Food*  
664 *Chemistry*, 60(2), 574–584.
- 665 Kurasch, A. K., Hahn, V., Leiser, W. L., Vollmann, J., Schori, A., Béatrix, C.-A., Mayr, B., Winkler,

- 666 J., Mechtler, K., Aper, J., Sudaric, A., Pejic, I., Sarcevic, H., Jeanson, P., Balko, C., Signor, M.,  
667 Miceli, F., Strijk, P., Rietman, H., Muresanu, E., Djordjevic, V., Pospišil, A., Barion, G., Weigold,  
668 P., Streng, S., Krön, M., and Würschum, T. (2017). “Identification of mega-environments in  
669 Europe and effect of allelic variations at maturity *E* loci on adaptation of European soybean.”  
670 *Plant, Cell & Environment*, 0000, 765–778.
- 671 Langridge, P. and Waugh, R. (2019). “Harnessing the potential of germplasm collections.” *Nature*  
672 *Genetics*, 51(2), 200–201.
- 673 Liao, Y., Zou, H. F., Wei, W., Hao, Y. J., Tian, A. G., Huang, J., Liu, Y. F., Zhang, J. S., and  
674 Chen, S. Y. (2008). “Soybean *GmbZIP44*, *GmbZIP62* and *GmbZIP78* genes function as negative  
675 regulator of ABA signaling and confer salt and freezing tolerance in transgenic Arabidopsis.”  
676 *Planta*, 228(2), 225–240.
- 677 Littlejohns, D. a. and Tanner, J. W. (1976). “Preliminary Studies on the Cold Tolerance of Soybean  
678 Seedlings.” *Canadian Journal of Plant Science*, 56(2), 371–375.
- 679 Liu, B., Watanabe, S., Uchiyama, T., Kong, F., Kanazawa, A., Xia, Z., Nagamatsu, A., Arai,  
680 M., Yamada, T., Kitamura, K., Masuta, C., Harada, K., and Abe, J. (2010). “The Soybean  
681 Stem Growth Habit Gene *Dt1* Is an Ortholog of Arabidopsis *TERMINAL FLOWER1*.” *Plant*  
682 *Physiology*, 153(1), 198–210.
- 683 Ma, Y. Y., Zhang, L. W., Li, P. L., Gan, R., Li, X. P., Zhang, R., Wang, Y., and Wang, N. N.  
684 (2006). “Cloning and preliminary characterization of three receptor-like kinase genes in soybean.”  
685 *Journal of Integrative Plant Biology*, 48(11), 1338–1347.
- 686 Malomane, D. K., Reimer, C., Weigend, S., Weigend, A., Sharifi, A. R., and Simianer, H. (2018).  
687 “Efficiency of different strategies to mitigate ascertainment bias when using SNP panels in  
688 diversity studies.” *BMC genomics*, 19(1), 22.
- 689 McGonigle, B., Keeler, S. J., Lau, S.-M. C., Koeppel, M. K., and O’Keefe, D. P. (2000). “A  
690 Genomics Approach to the Comprehensive Analysis of the Glutathione *S* -Transferase Gene  
691 Family in Soybean and Maize.” *Plant Physiology*, 124(3), 1105–1120.
- 692 Mizoi, J., Otori, T., Moriwaki, T., Kidokoro, S., Todaka, D., Maruyama, K., Kusakabe, K., Os-

- 693 akabe, Y., Shinozaki, K., and Yamaguchi-Shinozaki, K. (2013). “*GmDREB2A;2*, a Canonical  
694 DEHYDRATION-RESPONSIVE ELEMENT-BINDING PROTEIN2-Type Transcription Fac-  
695 tor in Soybean, Is Posttranslationally Regulated and Mediates Dehydration-Responsive Element-  
696 Dependent Gene Expression.” *Plant Physiology*, 161(1), 346–361.
- 697 Nelson, R. L. (2011). “Managing self-pollinated germplasm collections to maximize utilization.”  
698 *Plant Genetic Resources*, 9(01), 123–133.
- 699 Odong, T. L., Jansen, J., van Eeuwijk, F. A., and van Hintum, T. J. (2013). “Quality of core  
700 collections for effective utilisation of genetic resources review, discussion and interpretation.”  
701 *Theoretical and Applied Genetics*, 126(2), 289–305.
- 702 Oliveira, M. F., Nelson, R. L., Geraldi, I. O., Cruz, C. D., and de Toledo, J. F. F. (2010). “Establishing  
703 a soybean germplasm core collection.” *Field Crops Research*, 119(2-3), 277–289.
- 704 Olsson, A. S., Engström, P., and Söderman, E. (2004). “The homeobox genes *ATHB12* and *ATHB7*  
705 encode potential regulators of growth in response to water deficit in *Arabidopsis*.” *Plant Molec-  
706 ular Biology*, 55(5), 663–677.
- 707 Park, S.-Y., Yu, J.-W., Park, J.-S., Li, J., Yoo, S.-C., Lee, N.-Y., Lee, S.-K., Jeong, S.-W., Seo, H. S.,  
708 Koh, H.-J., Jeon, J.-S., Park, Y.-I., and Paek, N.-C. (2007). “The Senescence-Induced Staygreen  
709 Protein Regulates Chlorophyll Degradation.” *the Plant Cell Online*, 19(5), 1649–1664.
- 710 Recknagel, J. D. S. (2015). “Sorten für Deutschland, <[https://www.sojafoerderring.de/  
711 anbauratgeber/sortenratgeber/deutschland/](https://www.sojafoerderring.de/anbauratgeber/sortenratgeber/deutschland/)>.
- 712 Sanders, R., Bari, A., Street, K., and Devlin, M. (2013). “A new approach to mining agricultural  
713 gene banks – to speed the pace of research innovation for food security. ‘FIGS’ - the Focused Iden-  
714 tification of Germplasm Strategy.” *Report No. 3*, International Center for Agricultural Research  
715 in the Dry Areas (ICARDA), Beirut.
- 716 Sasaki, K. and Imai, R. (2012). “Pleiotropic Roles of Cold Shock Domain Proteins in Plants.”  
717 *Frontiers in Plant Science*, 2(January), 1–6.
- 718 Schmutz, J., Cannon, S. B., Schlueter, J., Ma, J., Mitros, T., Nelson, W., Hyten, D. L., Song, Q.,  
719 Thelen, J. J., Cheng, J., Xu, D., Hellsten, U., May, G. D., Yu, Y., Sakurai, T., Umezawa, T.,

- 720 Bhattacharyya, M. K., Sandhu, D., Valliyodan, B., Lindquist, E., Peto, M., Grant, D., Shu, S.,  
721 Goodstein, D., Barry, K., Futrell-Griggs, M., Abernathy, B., Du, J., Tian, Z., Zhu, L., Gill, N.,  
722 Joshi, T., Libault, M., Sethuraman, A., Zhang, X.-C., Shinozaki, K., Nguyen, H. T., Wing, R. a.,  
723 Cregan, P., Specht, J., Grimwood, J., Rokhsar, D., Stacey, G., Shoemaker, R. C., and Jackson,  
724 S. a. (2010). “Genome sequence of the palaeopolyploid soybean..” *Nature*, 463(7278), 178–183.
- 725 Schnable, P. S., Wu, Y., Wang, M. L., Guo, T., Yu, J., Tesso, T. T., Bernardo, R., Roozeboom,  
726 K. L., Wang, D., Yu, X., Li, X., Mitchell, S. E., Pederson, G. A., and Zhu, C. (2016). “Genomic  
727 prediction contributing to a promising global strategy to turbocharge gene banks.” *Nature Plants*,  
728 2(10), 16150.
- 729 Silva, P. A., Silva, J. C. F., Caetano, H. D., Machado, J. P. B., Mendes, G. C., Reis, P. A., Brustolini,  
730 O. J., Dal-Bianco, M., and Fontes, E. P. (2015). “Comprehensive analysis of the endoplasmic  
731 reticulum stress response in the soybean genome: Conserved and plant-specific features.” *BMC*  
732 *Genomics*, 16(1), 1–20.
- 733 Somers, D. E., Schultz, T. F., Milnamow, M., and Kay, S. A. (2000). “*ZEITLUPE* encodes a novel  
734 clock-associated PAS protein from *Arabidopsis*.” *Cell*, 101(3), 319–329.
- 735 Song, Q., Hyten, D. L., Jia, G., Quigley, C. V., Fickus, E. W., Nelson, R. L., and Cregan, P. B.  
736 (2013). “Development and Evaluation of SoySNP50K, a High-Density Genotyping Array for  
737 Soybean.” *PLoS ONE*, 8(1), 1–12.
- 738 Song, Q., Hyten, D. L., Jia, G., Quigley, C. V., Fickus, E. W., Nelson, R. L., and Cregan, P. B.  
739 (2015). “Fingerprinting Soybean Germplasm and Its Utility in Genomic Research..” *G3*, 5(10),  
740 1999–2006.
- 741 Song, W., Solimeo, H., Rupert, R. A., Yadav, N. S., and Zhu, Q. (2002). “Functional dissection of  
742 a Rice Dr1/DrAp1 transcriptional repression complex.” *Plant Cell*, 14(January), 181–195.
- 743 Spencer, C. C., Su, Z., Donnelly, P., and Marchini, J. (2009). “Designing genome-wide association  
744 studies: Sample size, power, imputation, and the choice of genotyping chip.” *PLoS Genetics*,  
745 5(5).
- 746 Street, K., Mackay, M., Zuev, E., Kaul, N., El Bouhssini, M., Konopka, J., and Mitrofanova, O.

- 747 (2008). “Diving into the genepool : a rational system to access specific traits from large germplasm  
748 collections.” *Proceedings of the 11th International wheat genetics symposium*, 28–31.
- 749 Su, L. T., Li, J. W., Liu, D. Q., Zhai, Y., Zhang, H. J., Li, X. W., Zhang, Q. L., Wang, Y., and Wang,  
750 Q. Y. (2014). “A novel MYB transcription factor, *GmMYBJ1*, from soybean confers drought and  
751 cold tolerance in *Arabidopsis thaliana*.” *Gene*, 538(1), 46–55.
- 752 Sun, H., Jia, Z., Cao, D., Jiang, B., Wu, C., Hou, W., Liu, Y., Fei, Z., Zhao, D., and Han, T.  
753 (2011). “*GmFT2a*, a soybean homolog of flowering locus T, is involved in flowering transition  
754 and maintenance.” *PLOS ONE*, 6(12), 18–20.
- 755 Tanksley, S. D. and McCouch, S. R. (1997). “Seed Banks and Molecular Maps: Unlocking Genetic  
756 Potential from the Wild.” *Science*, 277(5329), 1063–1066.
- 757 Thachuk, C., Crossa, J., Franco, J., Dreisigacker, S., Warburton, M., and Davenport, G. F. (2009).  
758 “Core Hunter: an algorithm for sampling genetic resources based on multiple genetic measures..”  
759 *BMC bioinformatics*, 10(243), 1–13.
- 760 Varshney, R. K., Singh, V. K., Kumar, A., Powell, W., and Sorrells, M. E. (2018). “Can genomics  
761 deliver climate-change ready crops?.” *Current Opinion in Plant Biology*, 45, 205–211.
- 762 Wang, C., Hu, S., Gardner, C., and Lübberstedt, T. (2017a). “Emerging Avenues for Utilization of  
763 Exotic Germplasm.” *Trends in Plant Science*, 22(7), 624–637.
- 764 Wang, H., Zhao, S., Gao, Y., and Yang, J. (2017b). “Characterization of dof transcription factors  
765 and their responses to osmotic stress in poplar (*Populus trichocarpa*).” *PLoS ONE*, 12(1), 1–19.
- 766 Wang, Y., Chai, C., Valliyodan, B., Maupin, C., Annen, B., and Nguyen, H. T. (2015). “Genome-  
767 wide analysis and expression profiling of the PIN auxin transporter gene family in soybean  
768 (*Glycine max*).” *BMC Genomics*, 16(1), 1–13.
- 769 Watanabe, S., Xia, Z., Hideshima, R., Tsubokura, Y., Sato, S., Yamanaka, N., Takahashi, R., Anai,  
770 T., Tabata, S., Kitamura, K., and Harada, K. (2011). “A map-based cloning strategy employing a  
771 residual heterozygous line reveals that the *GIGANTEA* gene is involved in soybean maturity and  
772 flowering.” *Genetics*, 188(2), 395–407.
- 773 Watson, A., Ghosh, S., Williams, M. J., Cuddy, W. S., Simmonds, J., Rey, M. D., Asyraf Md Hatta,

- 774 M., Hinchliffe, A., Steed, A., Reynolds, D., Adamski, N. M., Breakspear, A., Korolev, A., Rayner,  
775 T., Dixon, L. E., Riaz, A., Martin, W., Ryan, M., Edwards, D., Batley, J., Raman, H., Carter, J.,  
776 Rogers, C., Domoney, C., Moore, G., Harwood, W., Nicholson, P., Dieters, M. J., Delacy, I. H.,  
777 Zhou, J., Uauy, C., Boden, S. A., Park, R. F., Wulff, B. B., and Hickey, L. T. (2018). “Speed  
778 breeding is a powerful tool to accelerate crop research and breeding.” *Nature Plants*, 4(1), 23–29.
- 779 Xavier, A., Thapa, R., Muir, W. M., and Rainey, K. M. (2018). “Population and quantitative  
780 genomic properties of the USDA soybean germplasm collection.” *Plant Genetic Resources:  
781 Characterisation and Utilisation*, 16(6), 513–523.
- 782 Yamaguchi, N., Kurosaki, H., Ishimoto, M., and Kawasaki, M. (2015). “Early-Maturing and  
783 Chilling-Tolerant Soybean Lines Derived from Crosses between Japanese and Polish Cultivars.”  
784 *Plant Production Science*, 18(August 2014), 234–239.
- 785 Yu, G. H., Jiang, L. L., Ma, X. F., Xu, Z. S., Liu, M. M., Shan, S. G., and Cheng, X. G. (2014). “A  
786 soybean C2H2-type zinc finger gene *GmZF1* enhanced cold tolerance in transgenic *Arabidopsis*.”  
787 *PLOS ONE*, 9(10).
- 788 Zeng, X., Liu, H., Du, H., Wang, S., Yang, W., Chi, Y., Wang, J., Huang, F., and Yu, D. (2018).  
789 “Soybean MADS-box gene *GmAGL1* promotes flowering via the photoperiod pathway.” *BMC  
790 Genomics*, 19(1), 1–17.
- 791 Zhao, C., Takeshima, R., Zhu, J., Xu, M., Sato, M., Watanabe, S., Kanazawa, A., Liu, B., Kong, F.,  
792 Yamada, T., and Abe, J. (2016). “A recessive allele for delayed flowering at the soybean maturity  
793 locus *E9* is a leaky allele of *FT2a*, a *FLOWERING LOCUS T* ortholog.” *BMC Plant Biology*,  
794 16(1), 1–15.
- 795 Zhou, Q. Y., Tian, A. G., Zou, H. F., Xie, Z. M., Lei, G., Huang, J., Wang, C. M., Wang, H. W., Zhang,  
796 J. S., and Chen, S. Y. (2008). “Soybean WRKY-type transcription factor genes, *GmWRKY13*,  
797 *GmWRKY21*, and *GmWRKY54*, confer differential tolerance to abiotic stresses in transgenic  
798 *Arabidopsis* plants.” *Plant Biotechnology Journal*, 6(5), 486–503.
